# Supplementary material for: A geospatial analysis of local intermediate snail host distributions provides insight into schistosomiasis risk within under-sampled areas of southern Lake Malawi
Source: Research Square preprint supplement (doi:10.21203/rs.3.rs-3949127/v2), 2024-03-05
Supplement: Supplementary file 1 [file 0d91c8b33cc685ea00b13275.docx]

*Additional file 7: Supplementary information*

**Priors**

(a) *Biomphalaria* sp.

(b) *Bulinus* spp.

**Figure S1:** Prior against the posterior distribution. a) *Biomphalaria* sp*.* b) *Bulinus* spp.
