# Supplementary material for: A geospatial analysis of local intermediate snail host distributions provides insight into schistosomiasis risk within under-sampled areas of southern Lake Malawi
Source: Research Square preprint supplement (doi:10.21203/rs.3.rs-3949127/v2), 2024-03-05
Supplement: Supplementary file 2 [file 423feb930e94fa0dc0243c4d.docx]

*Additional file 8: Supplementary information*

**1D result**

(a) *Biomphalaria* sp.


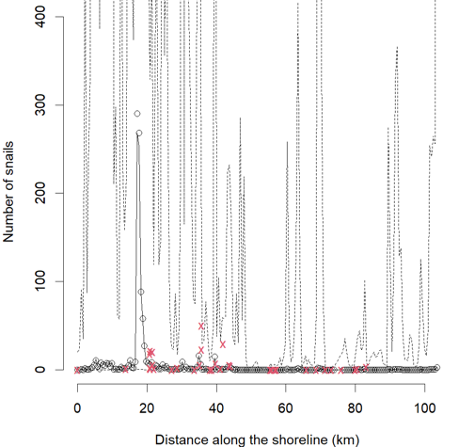


(b) *Bulinus* spp.


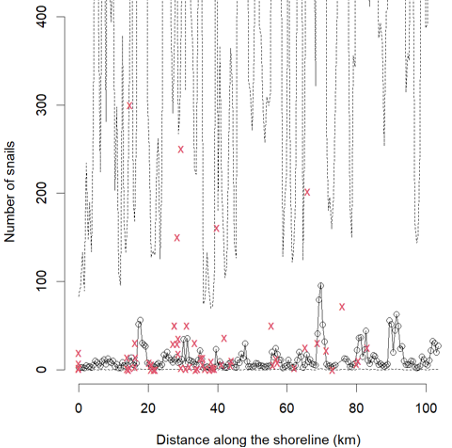


**Figure S1:** 1D mean GP prediction (Exponential covariance function) of number of snails against distance along the shoreline (km) a) *Biomphalaria* sp. b) *Bulinus* spp.Red crosses: observed number of snails at sampling locations along the shoreline. Black faded lines: SD of GP values.
