# Supplementary material for: A geospatial analysis of local intermediate snail host distributions provides insight into schistosomiasis risk within under-sampled areas of southern Lake Malawi
Source: Research Square preprint supplement (doi:10.21203/rs.3.rs-3949127/v2), 2024-03-05
Supplement: Supplementary file 3 [file 57d6e0a7898f217758c919d4.docx]

*Additional file 2: Supplementary information*

**Model Formulation**

***Model***

We used a Bayesian log-linear Gaussian Process model to smooth observations of snail abundance along the shoreline. We assume that the number of snails at observed (sampling) locations expressed as distance along the shoreline relative to an arbitrary reference point follow a Poisson distribution with mean :

The mean number of snails is then modelled on the log-scale as sum of two components: a set of covariates expressed through the design matrix Ζ and a Gaussian process:

Sis modelled using a 1-Dimensional (1D) Gaussian process with exponential correlation function with standard deviation and fixed length scale (5% range of measured shoreline). We also included an additional uncorrelated variance term (nugget effect). We place priors on our unknown model parameters,

The STAN probabilistic programming language was used to fit the model, allowing us to project the Gaussian process onto a fine grid of points along the shoreline to create predictions of snail abundance at arbitrary points in our study region.

*GP prediction*

To get the GP prediction values we find the mean of the Poisson distribution variables.

,

where is our GP prediction of the number of snails present, is the covariate values for each prediction point, where i=1,….,N point.

*Latent Gaussian process*

Where m is the mean and k is the covariance function which we use exponential function with length scale, We add a nugget effect, to the k for each observation. Then a Cholesky decomposition of k is applied which gives,

,

where is the non-centred random effect.
