# Supplementary material for: A geospatial analysis of local intermediate snail host distributions provides insight into schistosomiasis risk within under-sampled areas of southern Lake Malawi
Source: Research Square preprint supplement (doi:10.21203/rs.3.rs-3949127/v2), 2024-03-05
Supplement: Supplementary file 4 [file 5a817c5072f20add9381cf36.docx]

*Additional file 3: Supplementary information*

**1D extracted environmental data**

**Figure S1:** Scatterplot of environmental data versus distance along (km) for prediction points


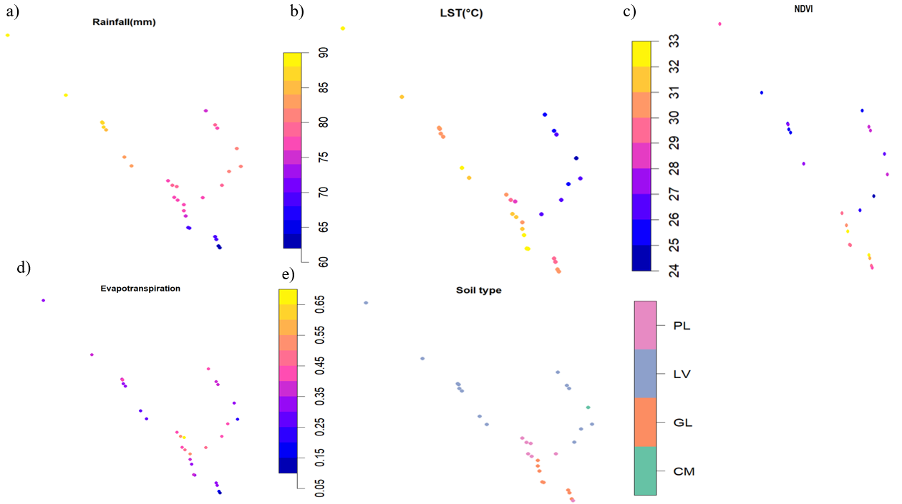


**Figure S2:** *Biomphalaria* sp.observed sample points extracted environmental data a) Rainfall (mm) b) LST ( c) NDVI (index) ) Evapotranspiration (index) e) Soil type


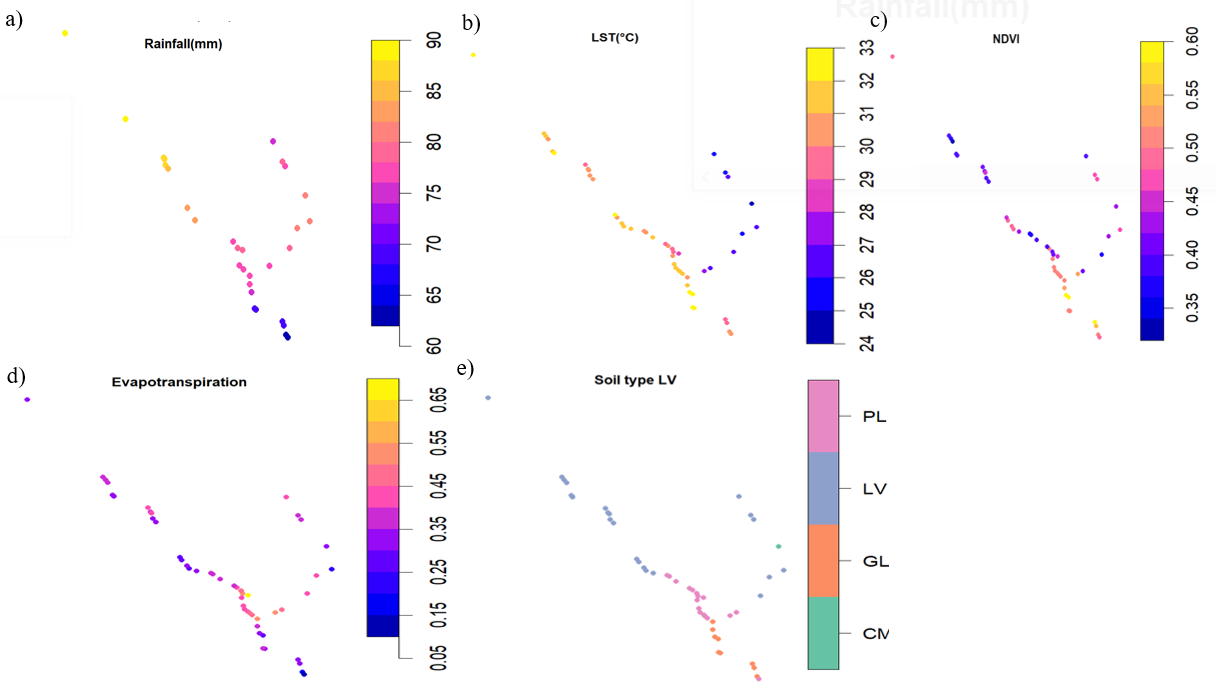


**Figure S3:** *Bulinus* spp. observed sample points extracted environmental data. a) Rainfall (mm) b) LST ( c) NDVI (index) ) Evapotranspiration (index) e) Soil type
