# Supplementary material for: A geospatial analysis of local intermediate snail host distributions provides insight into schistosomiasis risk within under-sampled areas of southern Lake Malawi
Source: Research Square preprint supplement (doi:10.21203/rs.3.rs-3949127/v2), 2024-03-05
Supplement: Supplementary file 5 [file 75a2255b5fa5ea3d7598a5b5.docx]

*Additional file 6: Supplementary information*

**Convergence**

(a) *Biomphalaria* sp.

(b) *Bulinus* spp.

**Figure S1**: Trace plot of Bayesian log-linear Gaussian Process fitted model in Stan a) *Biomphalaria* sp. b) *Bulinus* spp.
