# Supplementary material for: A geospatial analysis of local intermediate snail host distributions provides insight into schistosomiasis risk within under-sampled areas of southern Lake Malawi
Source: Research Square preprint supplement (doi:10.21203/rs.3.rs-3949127/v2), 2024-03-05
Supplement: Supplementary file 6 [file a68dcac3ac557ac122295b0d.docx]

*Additional file 4: Supplementary information*

**Center and scaling environment data**

1. *Biomphalaria* sp.

1. *Bulinus* spp.

**Figure S1:** Observed points values for each covariate centred and scaled a) *Biomphalaria* sp. b) *Bulinus* spp.

(a) *Biomphalaria sp.*

(b) *Bulinus* spp.

**Figure S2**: Prediction points values for each covariate centred and scaled. a) *Biomphalaria* sp. b) *Bulinus* spp.
