# Supplementary material for: A geospatial analysis of local intermediate snail host distributions provides insight into schistosomiasis risk within under-sampled areas of southern Lake Malawi
Source: Research Square preprint supplement (doi:10.21203/rs.3.rs-3949127/v2), 2024-03-05
Supplement: Supplementary file 7 [file e01f36b8499042959cf7a9c3.docx]

*Additional file 9: Supplementary information*

**Bathymetric data**

(a) *Biomphalaria* sp.

**
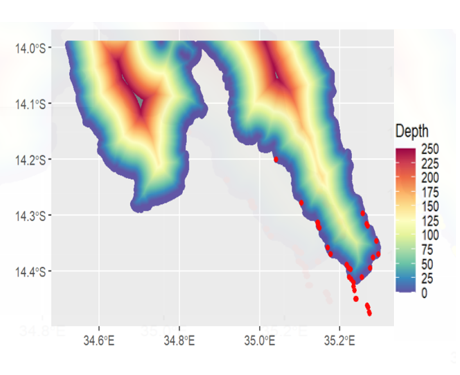
**

(b) *Bulinus* spp. **
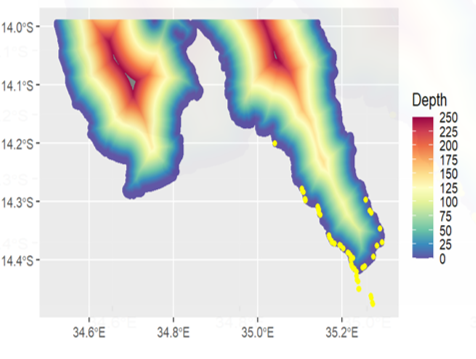
**

**Figure S1:** Bathymetric water depth (m) data for the shoreline with observe snails plotted a *Biomphalaria* sp. b) *Bulinus* spp.


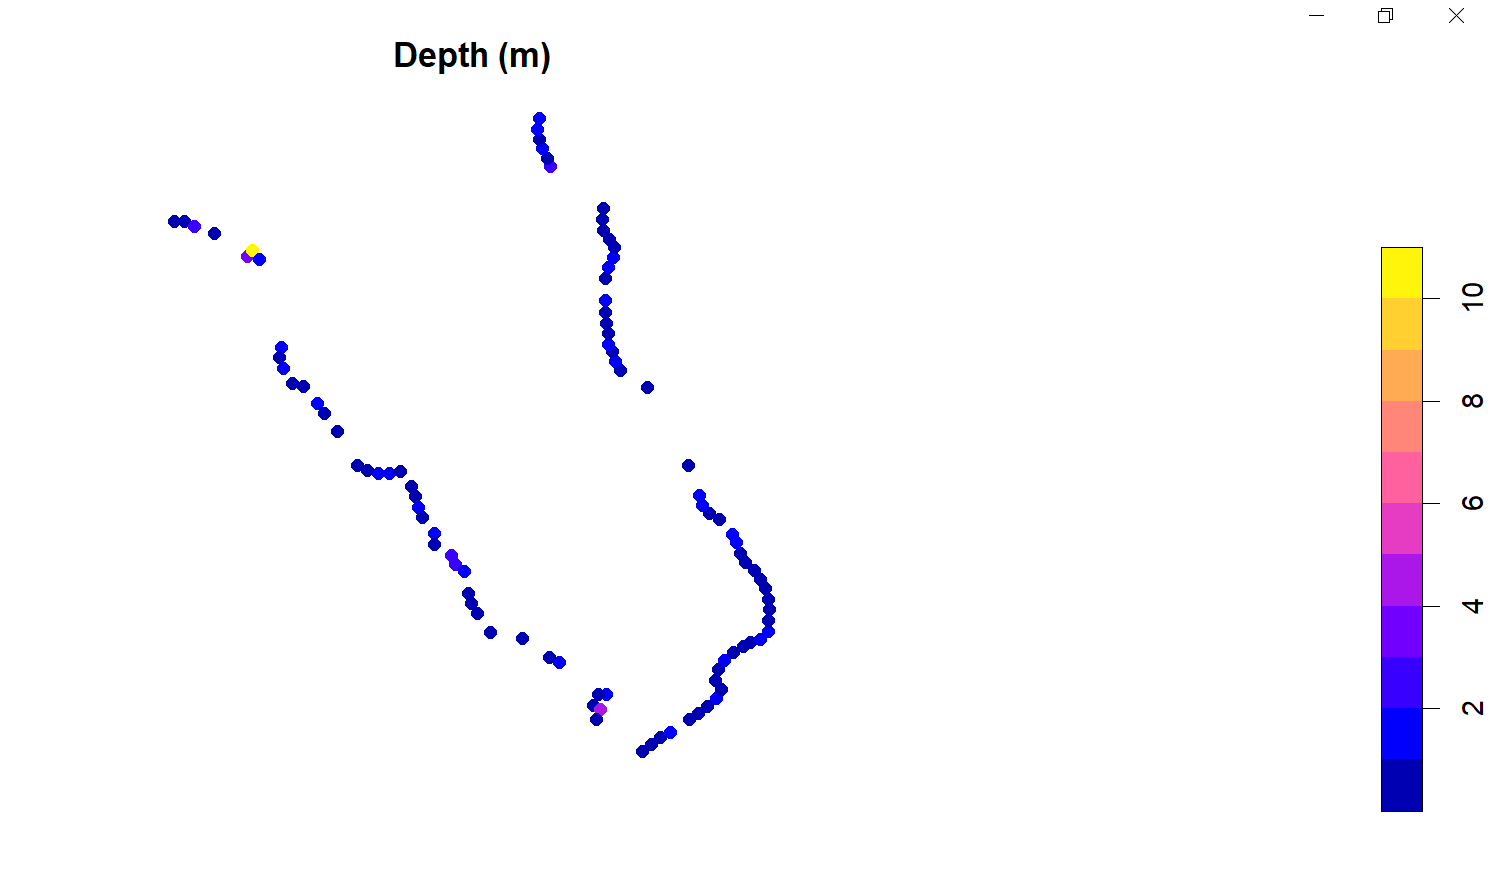


**Figure S2:** 2D plot of depth (m) extracted for the prediction points with 100km buffer.


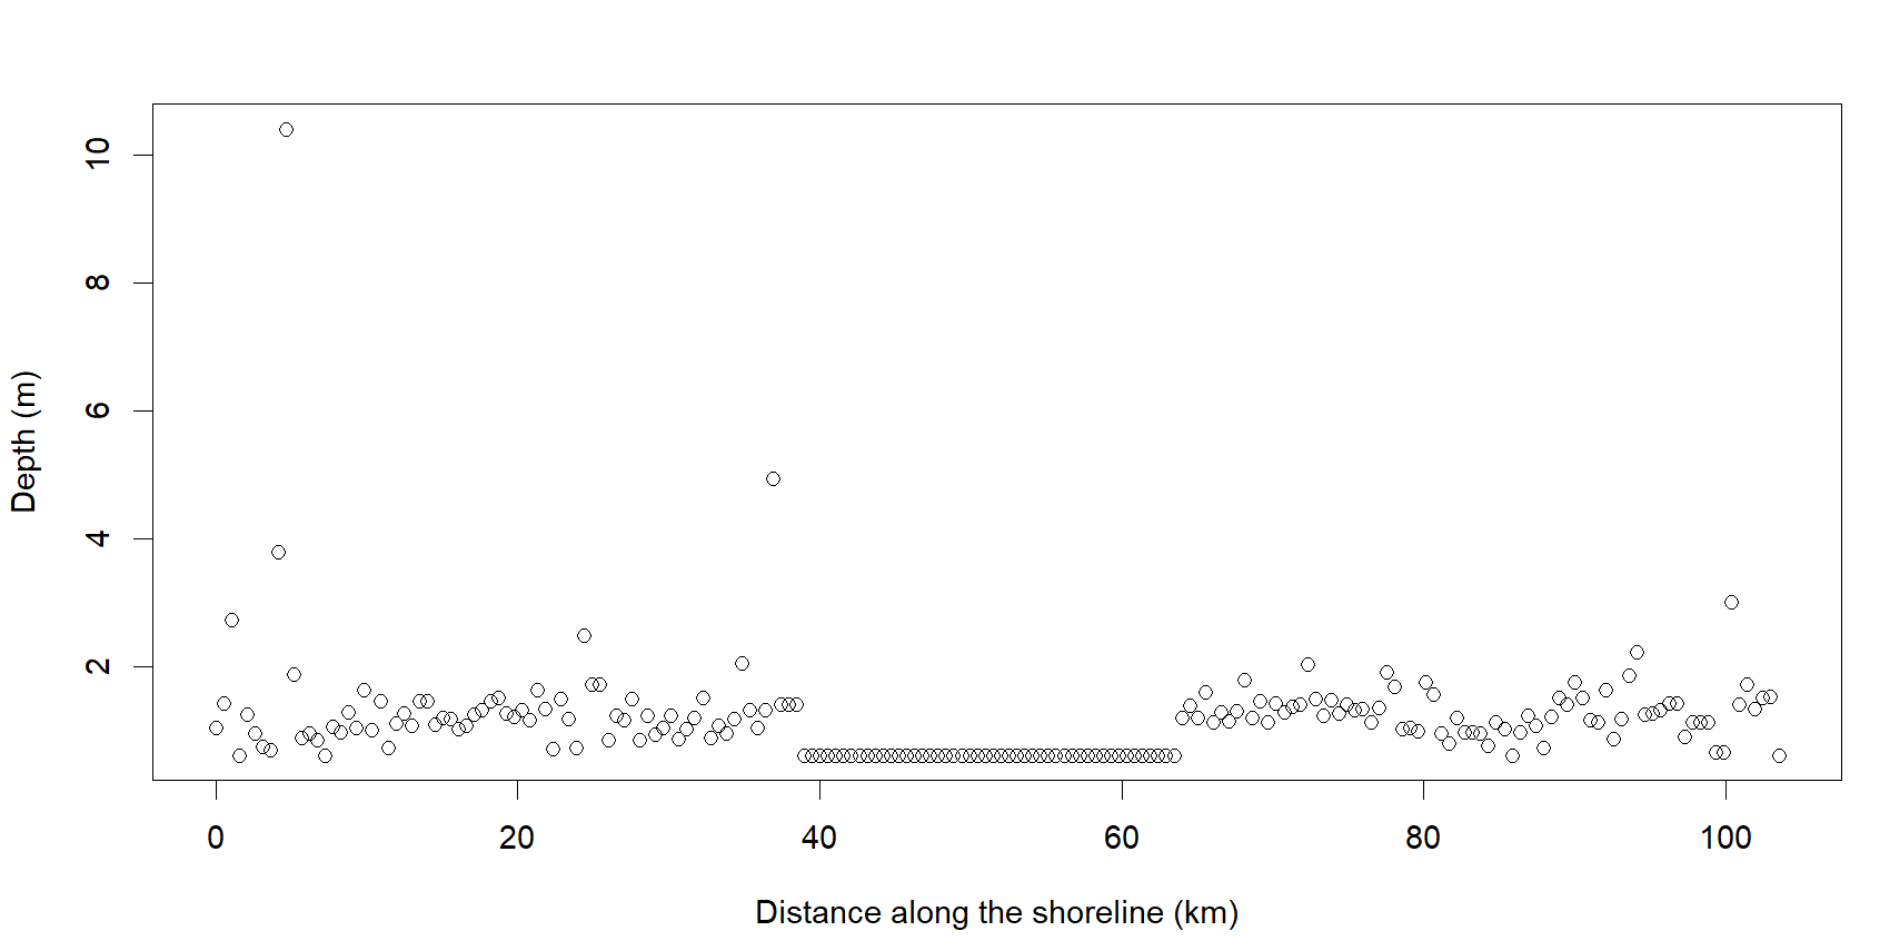


**Figure S3**: Depth (m) against distance along (km) the shoreline with 100km buffer and fill in NAs for the shoreline.
