# Supplementary material for: A geospatial analysis of local intermediate snail host distributions provides insight into schistosomiasis risk within under-sampled areas of southern Lake Malawi
Source: Research Square preprint supplement (doi:10.21203/rs.3.rs-3949127/v2), 2024-03-05
Supplement: Supplementary file 8 [file e38b683cd089d650214792f7.docx]

*Additional file 5: Supplementary information*

**Covariance functions**

(a) *Biomphalaria* sp.

(b) *Bulinus* spp.

**Figure S1**:Comparison of covariance functions for above snails mean abundance for a) *Biomphalaria* sp*. b) Bulinus* spp. against distance along (km).

1. *Biomphalaria* sp*.*

1. *Bulinus* spp.

**Figure S2:** Comparison of covariance functions for number of snails predicted for a) *Biomphalaria* sp. *b) Bulinus* spp. against distance along (km).
